# Supplementary material
Source: publisher figshare collection journal article supplement (https://frontiersin.figshare.com/ndownloader/files/15050816)
Supplement: Supplementary file 1 [file 15050816]

## *Supplementary Figure 2*

### **Measuring up to reality: null models and analysis simulations to study parental coordination over provisioning offspring**

**Malika Ihle\*, Joel L Pick, Isabel S Winney, Shinichi Nakagawa & Terence Burke**

- Correspondence: [malika\\_ihle@hotmail.fr](mailto:malika_ihle@hotmail.fr)

**Supplementary Figure 2:** Presentation of the assumptions of a Poisson process which we use to simulate random provisioning patterns. Each simulation steps are graphically represented and/or described.

# Poisson process assumption: exponentially distributed intervals

**Exponential distribution**

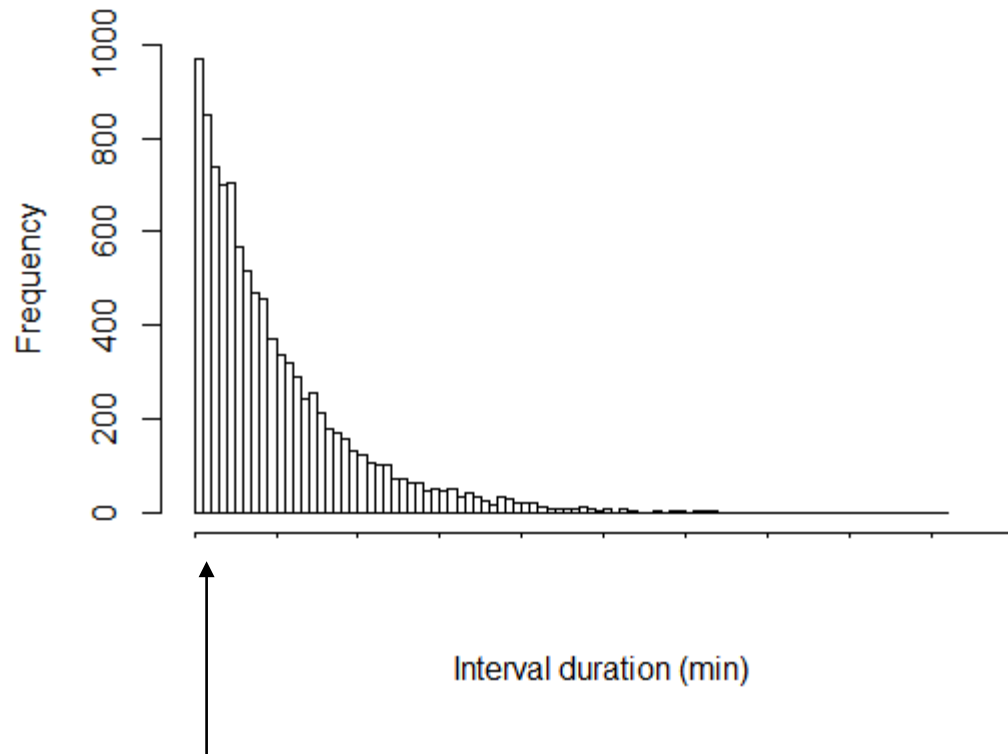

Shorter intervals are more likely – no refractory period

**Uniform distribution**

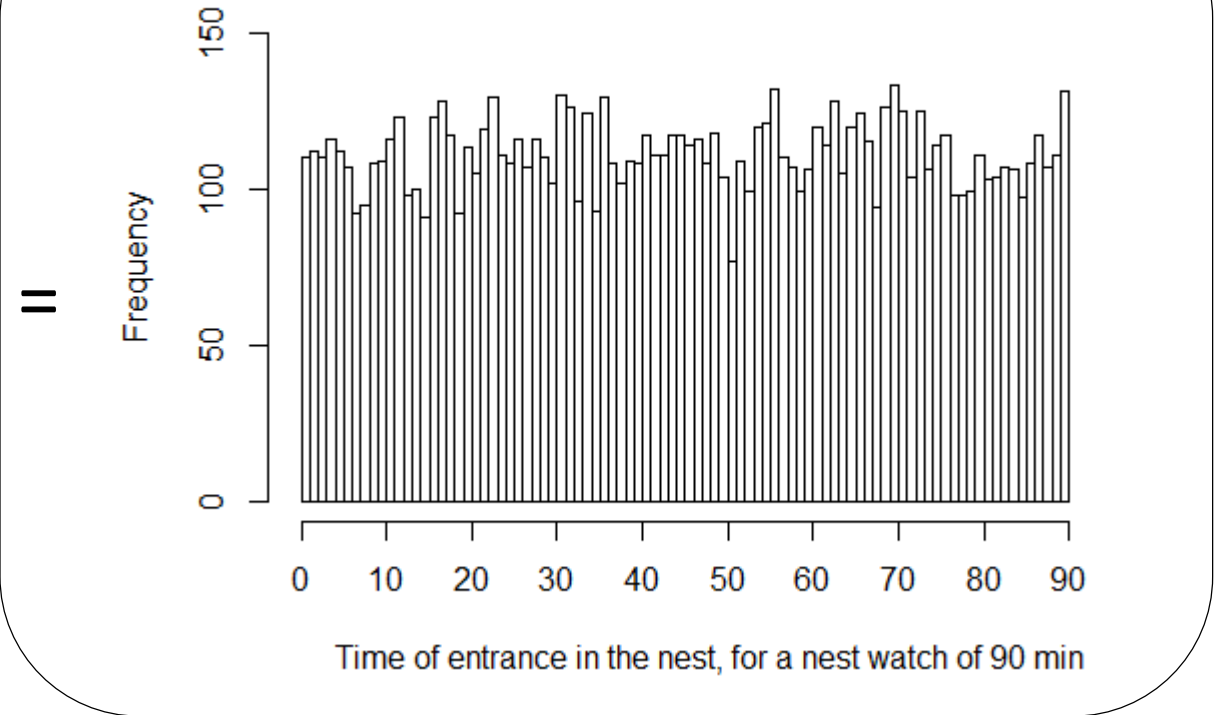

# Simulation of nest watches with exponentially distributed intervals

## 1. Generate provisioning rates

**Overdispersed Poisson distribution**

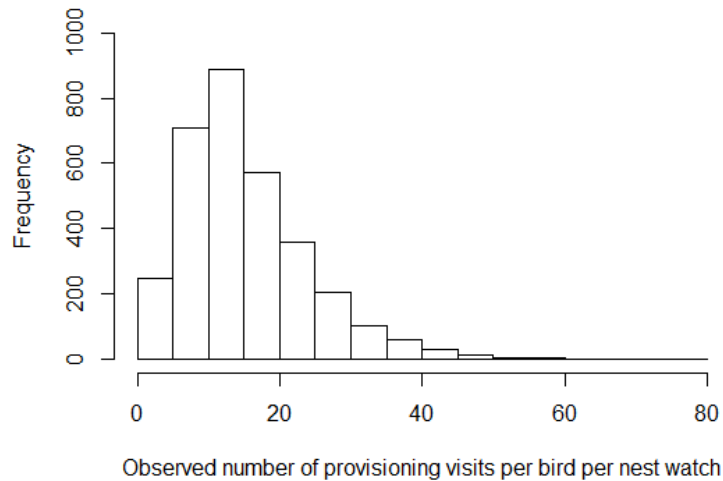

- Extract observed mean and SD
- Transform to expected mean and SD by removing Poisson distributed stochastic error
- Transpose to the log scale using Jensen's inequality

**Log Normal distribution**

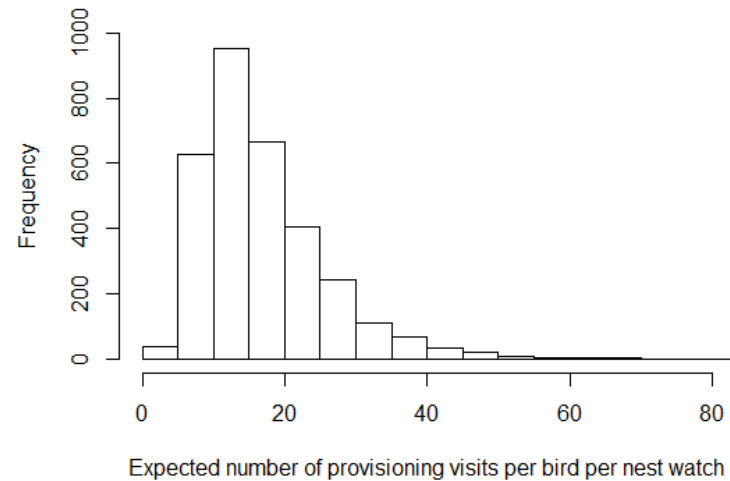

- Simulate expected provisioning rates

**Overdispersed Poisson distribution**

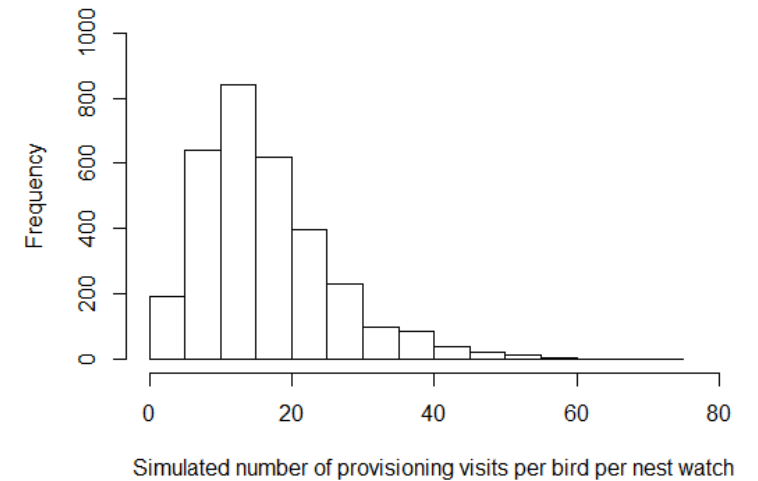

- Add Poisson distributed error to obtain simulated provisioning rate

# Simulation of nest watches with exponentially distributed intervals

## 2. Generate nest visits

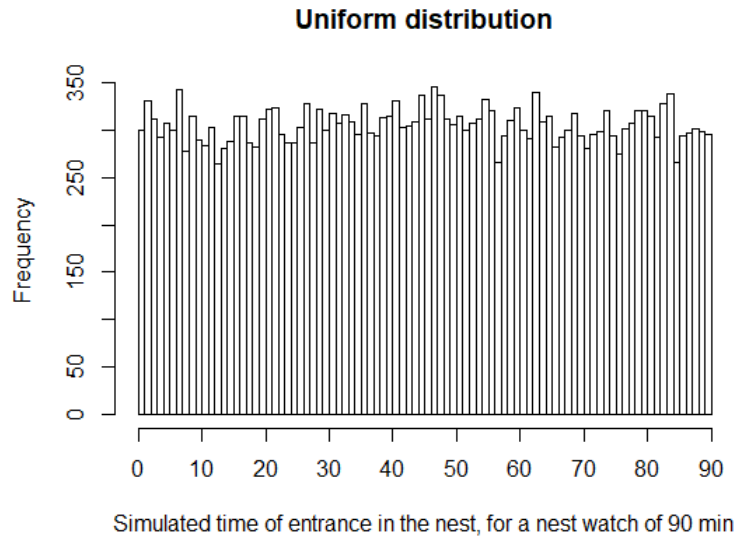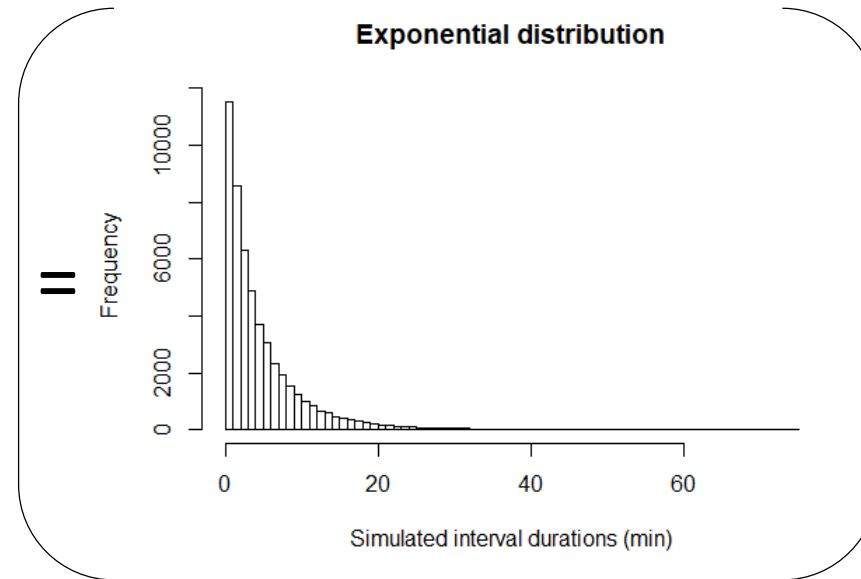

a. For each bird and its number of provisioning visit simulated ( $nV$ ), draw  $nV$  number of nest entrance times

3. Combine two birds' nest visit times to form a simulate nest watch and calculate the number of alternated and synchronized visits

4. Repeat many times (here 1599, the number of observed nest watches)
